# Supplementary material
Source: Springer Nature journal article supplement (https://www.springermedizin.de/resource/supplementary/13002_2011_222_MOESM2_ESM.pdf/9627420)
Supplement: MOESM2 [file 9627420]

# EAST KAMENG

Arunachal Pradesh

TIBET

Latitude:  $26^{\circ} 56''$  to  $27^{\circ} 59''$  N  
Longitude:  $92^{\circ} 36''$  E to  $93^{\circ} 24''$  E

WEST KAMENG

LOWER SUBANSIRI

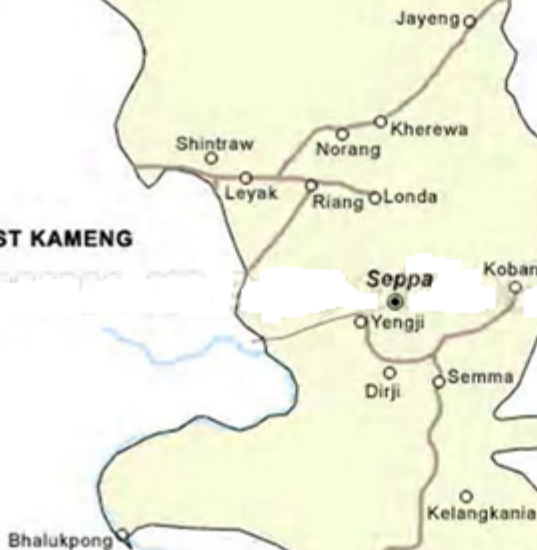

Map not to Scale

ASSAM
